# Supplementary material
Source: HighWire-hosted journal article supplement (https://jnm.snmjournals.org/highwire/filestream/94630/field_highwire_adjunct_files/0/144741_Supplemental_Data.pdf)
Supplement: 144741_Supplemental_Data.pdf [file 144741_Supplemental_Data.pdf]

**Supplemental Table 1: Dose modifications**

| Reason for modification         | Dose modification*   |              |                               |              |
|---------------------------------|----------------------|--------------|-------------------------------|--------------|
|                                 | Chemotherapy-related |              | Vorinostat or placebo-related |              |
|                                 | Dose reduced         | Discontinued | Dose reduced                  | Discontinued |
| <i>Hematologic toxicity</i>     |                      |              |                               |              |
| Platelets                       | 2                    | 2            | 1                             | 2            |
| Neutrophils                     | 22                   | 2            | 28                            | 1            |
| <i>Non-hematologic toxicity</i> |                      |              |                               |              |
| Constipation                    |                      | 1            |                               | 1            |
| Diarrhea                        |                      |              | 1                             |              |
| ALT-increased                   | 2                    |              | 1                             |              |
| Neuropathy                      | 6                    | 2            |                               | 3            |
| Hypersensitivity reaction       |                      | 5            | 1                             | 1            |

\*If a participant had a dose reduction prior to dose discontinuation for the same event, only the dose discontinuation is noted. If a participant had a dose reduction/discontinuation at different time points for different events, all modification reasons are noted. The modifications for chemotherapy- and vorinostat or placebo-related events are noted separately.

**Supplemental Table 2:** Treatment-related side effects occurring in > 3 patients across arms

| Toxicity                                            | Vorinostat Arm (N= 31) |          |    |    | Placebo Arm (N= 31)      |          |    |    |
|-----------------------------------------------------|------------------------|----------|----|----|--------------------------|----------|----|----|
|                                                     | Total Events<br>n (%)  | By Grade |    |    | Total<br>Events<br>n (%) | By Grade |    |    |
|                                                     |                        | ≤ G2     | G3 | G4 |                          | ≤ G2     | G3 | G4 |
| <i>Allergy/Immunology</i>                           |                        |          |    |    |                          |          |    |    |
| Allergic Reaction                                   | 1 (3%)                 | 1        | 0  | 0  | 10 (32%)                 | 8        | 2  | 0  |
| <i>Blood/Bone Marrow &amp; Metabolic/Laboratory</i> |                        |          |    |    |                          |          |    |    |
| Anemia<br>(hemoglobin)                              | 20 (64.5%)             | 16       | 4  | 0  | 9 (29%)                  | 9        | 0  | 0  |
| Neutropenia<br>(neutrophils)                        | 29 (93.5%)             | 10       | 14 | 5  | 28 (90%)                 | 14       | 7  | 7  |
| Thrombocytopenia<br>(platelets)                     | 15 (48%)               | 15       | 0  | 0  | 10 (32%)                 | 9        | 1  | 0  |
| Elevated ALT                                        | 1 (3%)                 | 1        | 0  | 0  | 4 (13%)                  | 3        | 1  | 0  |
| <i>Constitutional Symptoms</i>                      |                        |          |    |    |                          |          |    |    |
| Chills                                              | 5 (16%)                | 5        | 0  | 0  | 4 (13%)                  | 4        | 0  | 0  |
| Fatigue                                             | 27 (87%)               | 26       | 1  | 0  | 31 (100%)                | 30       | 1  | 0  |
| Insomnia                                            | 5 (16%)                | 5        | 0  | 0  | 6 (19%)                  | 6        | 0  | 0  |
| <i>Dermatology/Skin</i>                             |                        |          |    |    |                          |          |    |    |
| Alopecia                                            | 29 (93.5%)             | 29       | 0  | 0  | 31 (100%)                | 31       | 0  | 0  |
| Nail Changes                                        | 3 (9.5%)               | 3        | 0  | 0  | 8 (26%)                  | 8        | 0  | 0  |
| Pruritus                                            | 1 (3%)                 | 1        | 0  | 0  | 3 (9.5%)                 | 3        | 0  | 0  |
| Rash                                                | 9 (29%)                | 9        | 0  | 0  | 9 (29%)                  | 9        | 0  | 0  |
| <i>Gastrointestinal</i>                             |                        |          |    |    |                          |          |    |    |
| Anorexia                                            | 19 (61%)               | 19       | 0  | 0  | 17 (55%)                 | 17       | 0  | 0  |
| Constipation                                        | 18 (58%)               | 17       | 1  | 0  | 14 (45%)                 | 14       | 0  | 0  |
| Diarrhea                                            | 18 (58%)               | 17       | 1  | 0  | 18 (58%)                 | 17       | 1  | 0  |
| Dry Mouth                                           | 6 (19%)                | 6        | 0  | 0  | 2 (6%)                   | 2        | 0  | 0  |
| Flatulence                                          | 3 (9.5%)               | 3        | 0  | 0  | 7 (22.5%)                | 7        | 0  | 0  |
| Heartburn<br>/Dyspepsia                             | 7 (22.5%)              | 7        | 0  | 0  | 9 (29%)                  | 9        | 0  | 0  |
| Mucositis                                           | 6 (19%)                | 6        | 0  | 0  | 10 (32%)                 | 10       | 0  | 0  |
| Nausea                                              | 29 (93.5%)             | 28       | 1  | 0  | 25 (80.5%)               | 24       | 1  | 0  |
| Taste alteration                                    | 17 (55%)               | 17       | 0  | 0  | 13 (42%)                 | 13       | 0  | 0  |
| Vomiting                                            | 19 (61%)               | 17       | 2  | 0  | 10 (32%)                 | 9        | 1  | 0  |
| <i>Hemorrhage/Bleeding</i>                          |                        |          |    |    |                          |          |    |    |
| Epistaxis                                           | 5 (16%)                | 5        | 0  | 0  | 14 (45%)                 | 14       | 0  | 0  |
| <i>Endocrine</i>                                    |                        |          |    |    |                          |          |    |    |
| Hot flashes                                         | 7 (22.5%)              | 7        | 0  | 0  | 8 (26%)                  | 8        | 0  | 0  |
| <i>Infection</i>                                    |                        |          |    |    |                          |          |    |    |
| Sinus Infection                                     | 4 (13%)                | 4        | 0  | 0  | 5 (16%)                  | 5        | 0  | 0  |
| Upper respiratory                                   | 3 (9.5%)               | 3        | 0  | 0  | 5 (16%)                  | 5        | 0  | 0  |

|                                    |            |    |   |   |            |    |   |   |
|------------------------------------|------------|----|---|---|------------|----|---|---|
| tract infection                    |            |    |   |   |            |    |   |   |
| <i>Neurology</i>                   |            |    |   |   |            |    |   |   |
| Dizziness                          | 1 (3%)     | 1  | 0 | 0 | 4 (13%)    | 4  | 0 | 0 |
| Sensory neuropathy                 | 20 (64.5%) | 20 | 0 | 0 | 25 (80.5%) | 25 | 0 | 0 |
| <i>Ocular/Visual</i>               |            |    |   |   |            |    |   |   |
| Visual change                      | 5 (16%)    | 5  | 0 | 0 | 4 (13%)    | 4  | 0 | 0 |
| <i>Pain</i>                        |            |    |   |   |            |    |   |   |
| Abdominal Pain                     | 6 (19%)    | 5  | 1 | 0 | 4 (13%)    | 4  | 0 | 0 |
| Arthralgia                         | 15 (48%)   | 15 | 0 | 0 | 13 (42%)   | 13 | 0 | 0 |
| Headache                           | 5 (16%)    | 5  | 0 | 0 | 8 (26%)    | 8  | 0 | 0 |
| Myalgia                            | 13 (42%)   | 13 | 0 | 0 | 11 (35%)   | 11 | 0 | 0 |
| <i>Pulmonary/Upper Respiratory</i> |            |    |   |   |            |    |   |   |
| Cough                              | 1 (3%)     | 1  | 0 | 0 | 3 (9.5%)   | 3  | 0 | 0 |
| Dyspnea                            | 0 (0%)     | 0  | 0 | 0 | 7 (22.5%)  | 7  | 0 | 0 |

Note: Number of worst grade adverse events possibly, probably, or definitely attributed to study drug administration. Toxicities are graded per the NCI CTCAE version 3 criteria. G1=Grade 1, G2=Grade 2, G3=Grade 3, G4=Grade 4. NOS= not otherwise specified.

**Supplemental Table 3:** Baseline and change in SULmax between pathological responders and non-responders (excluding patients who receiving additional pre-operative non study chemotherapy)

| Variable                   | Responders<br>(n = 11) | Non-responders<br>(n = 31) | <i>P</i> * |
|----------------------------|------------------------|----------------------------|------------|
| Baseline SULmax            |                        |                            |            |
| Mean ( $\pm$ SD)           | 8.8 ( $\pm$ 2.9)       | 5.8 ( $\pm$ 3.7)           | 0.005      |
| Median (range)             | 7.9 (5.2 – 15.1)       | 5.3 (1.7 – 21.0)           |            |
| %Change in SULmax          |                        |                            |            |
| Mean ( $\pm$ SD)           | 65.0 ( $\pm$ 15.2)     | 31.4 ( $\pm$ 27.8)         | <0.001     |
| Median (range)             | 67.3 (36.3 – 85.3)     | 34.1 (-53.0 – 72.5)        |            |
| $\geq$ 50% reduction, n[%] | 9 (81.8)               | 10 (32.3)                  | 0.011      |

\*Nonparametric exact Wilcoxon rank sum test for continuous variables and Fisher's exact test for dichotomized variables.

**Supplemental Table 4:** Analysis of association of SULmax with pathological response  
(excluding patients receiving additional pre-operative non study chemotherapy)

| Variable                             | Univariate analysis |          | Multivariable analysis* |                      |
|--------------------------------------|---------------------|----------|-------------------------|----------------------|
|                                      | OR<br>(95% CI)      | <i>P</i> | Adjusted OR<br>(95% CI) | Adjusted<br><i>P</i> |
| Baseline SULmax                      | 1.26 (1.03–1.65)    | 0.048    | 1.08 (0.84–1.39)        | 0.517                |
| %Change in SULmax                    | 1.11 (1.05–1.21)    | 0.004    | 1.09 (1.03–1.20)        | 0.016                |
| %Change in SULmax<br>≥ 50% vs. < 50% | 9.45 (1.90–70.1)    | 0.010    | 7.09 (1.14–63.4)        | 0.048                |

OR = odds ratio; CI = confidence interval

\*Multivariable logistic regression adjusting for ER and PR status.

**Supplemental Table 5:** Baseline and change in Ki67 and ER between pathological responders and non-responders

| <b>Variable</b>                              | <b>Responders</b>  | <b>Non-responders</b> | <b>P*</b> |
|----------------------------------------------|--------------------|-----------------------|-----------|
| Baseline Ki67 (%)                            | N=15               | N=44                  |           |
| Mean ( $\pm$ SD)                             | 61.3 ( $\pm$ 15.5) | 47.8 ( $\pm$ 24.0)    |           |
| Median (range)                               | 60 (39–90)         | 50 (1–90)             | 0.056     |
| D15 Ki67 (%)                                 | N=10               | N=36                  |           |
| Mean ( $\pm$ SD)                             | 49.3 ( $\pm$ 23.2) | 34.2 ( $\pm$ 17.7)    |           |
| Median (range)                               | 45.5 (10–80)       | 33.5 (5–70)           | 0.064     |
| Absolute change in Ki67<br>(%, Baseline-D15) | N=8                | N=36                  |           |
| Mean ( $\pm$ SD)                             | 7.0 ( $\pm$ 15.8)  | 12.0 ( $\pm$ 22.7)    |           |
| Median (range)                               | 11 (-20–31)        | 4.5 (-34–60)          | 0.988     |
| % Change in Ki67                             | N=8                | N=36                  |           |
| Mean ( $\pm$ SD)                             | 10.5 ( $\pm$ 30.0) | -11.9 ( $\pm$ 153.7)  |           |
| Median (range)                               | 16.9 (-40.0–49.2)  | 11.0 (-850.0–90.0)    | 0.819     |
| Baseline ER (%)                              | N=15               | N=44                  |           |
| Mean ( $\pm$ SD)                             | 5 ( $\pm$ 16)      | 44 ( $\pm$ 43)        |           |
| Median (range)                               | 0 (0–60)           | 55 (0–100)            | 0.001     |
| D15 ER (%)                                   | N=9                | N=37                  |           |
| Mean ( $\pm$ SD)                             | 6 ( $\pm$ 17)      | 46 ( $\pm$ 43)        |           |
| Median (range)                               | 0 (0–50)           | 60 (0–100)            | 0.008     |
| Absolute change in ER<br>(%, Baseline-D15)   | N=8                | N=37                  |           |
| Mean ( $\pm$ SD)                             | 4 ( $\pm$ 7)       | 0.7 ( $\pm$ 8)        |           |
| Median (range)                               | 0 (0–20)           | 0 (-18–30)            | 0.273     |

\*Nonparametric exact Wilcoxon rank sum test
